# Supplementary material for: Nanoparticle chemisorption printing technique for conductive silver patterning with submicron resolution
Source: PubMed Central journal article supplement (PMC4838887; doi:10.1038/ncomms11402), 2016-04-19
Supplement: ncomms11402-s1.pdf [file ncomms11402-s1.pdf]

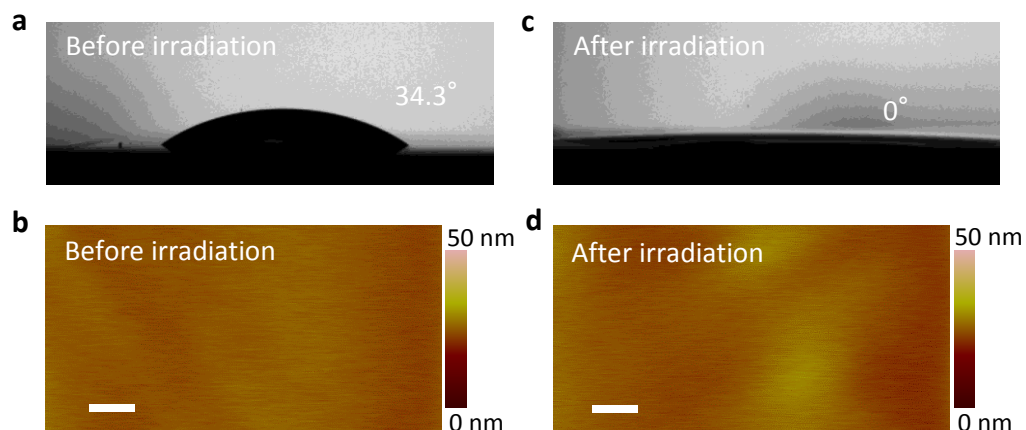

**Supplementary Figure 1 | Wettability of photoactivated polymer surface.** (a) Contact angle image of dispersion media (4:1 mixed solvent of *n*-octane and *n*-butanol) on the spin-coated Cytop<sup>®</sup> film surface before VUV irradiation, and (b) surface profile AFM image on top of the Cytop<sup>®</sup> film surface before VUV irradiation. (c) Contact angle image after VUV irradiation (wavelength at 172 nm and power density at 130 mJ cm<sup>-2</sup>), and (d) surface profile AFM image after the VUV irradiation. The contact angle is 34.3° before the irradiation, and reduces to almost 0° by the irradiation, whereas no change is observed in the surface profiles at least at low irradiance level. (We observed an irradiation-induced hollow by the irradiance at higher than 1 J cm<sup>-2</sup>.) The scale bars in **b** and **d** are 5 μm.

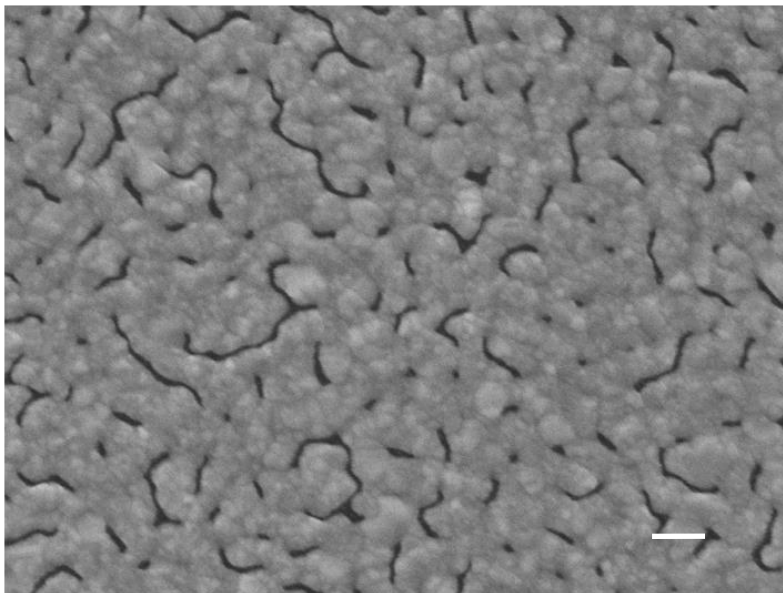

**Supplementary Figure 2 | SEM image of evaporated silver film.** The image shows SEM image of 30 nm-thick silver film fabricated by vacuum deposition on a photoactivated Cytop<sup>®</sup> film surface. We observed similar granular morphology with several vacancies in the film as in the 30-nm thick printed silver layer presented in Fig. 4b. The result indicates that the feature could be ascribed to the columnar growth of silver. The scale bar is 100 nm.

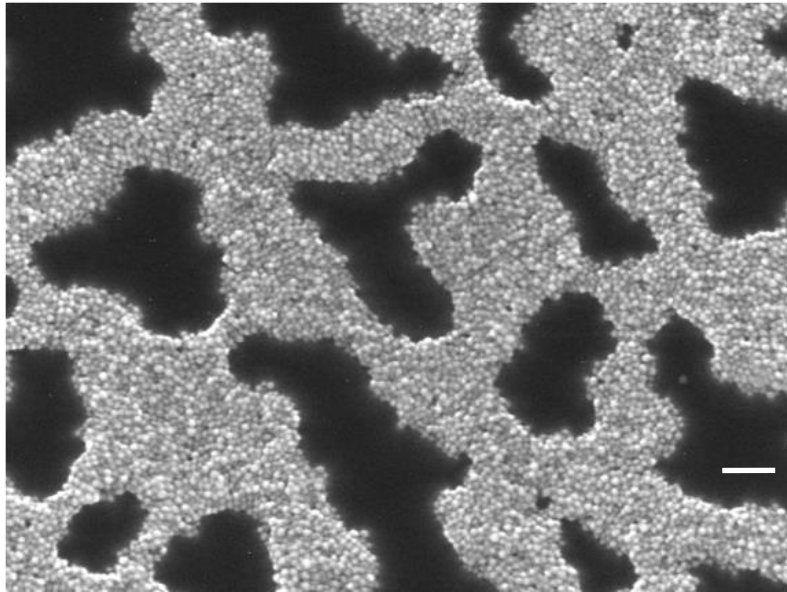

**Supplementary Figure 3 | SEM image of printed silver layer on weakly-photoactivated surface.** When the silver nanometal ink is coated on the weakly-photoactivated Cytop<sup>®</sup> film with much lower VUV irradiation dose at  $20 \text{ mJ cm}^{-2}$ , conductivity becomes extremely lower than that obtained with usual dose level ( $\sim 100 \text{ mJ cm}^{-2}$ ). We found that at this dose level the coated nanometal ink forms network-like pattern on the surface as presented in this SEM image; the pattern morphology should be dominated by the aggregation of AgNPs rather than by the adsorption of AgNPs on the photoactivated surface. The scale bar is 100 nm.

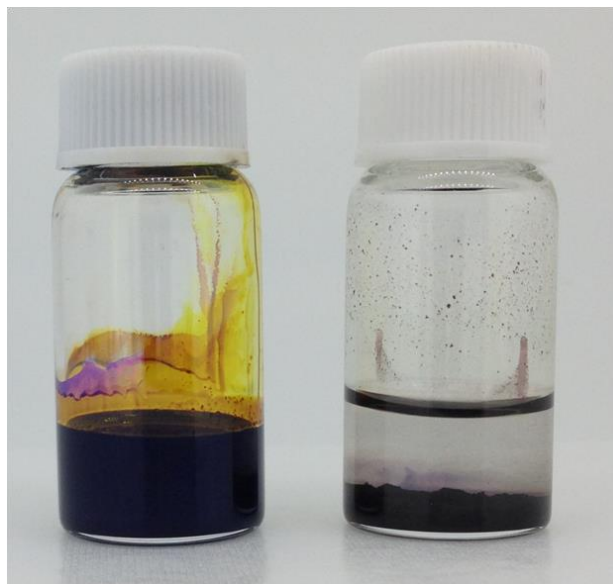

**Supplementary Figure 4 | Appearance of alkylamine-encapsulated silver nanometal ink.** Left: silver nanometal ink at 50 wt%. Right: at 1.25 wt%. This image indicates that the ink stability is acquired only at enough high concentration, while stable dispersion becomes difficult when it is diluted.
